# Supplementary material
Source: MDPI journal article supplement (https://www.mdpi.com/2073-4433/12/5/578)
Supplement: s1 [file s1]

# Supplementary Materials: Evaluation and Bias Correction of the Secondary Inorganic Aerosol Modeling over North China Plain in Autumn and Winter Atmosphere 2021

Qian Wu<sup>1,2</sup>, Xiao Tang<sup>1,8\*</sup>, Lei Kong<sup>1,2</sup>, Xu Dao<sup>3</sup>, Miaomiao Lu<sup>4,5</sup>, Zirui Liu<sup>1</sup>, Wei Wang<sup>3</sup>, Qian Wang<sup>6</sup>, Duohong Chen<sup>7</sup>, Lin Wu<sup>1</sup>, Xiaole Pan<sup>1</sup>, Jie Li<sup>1,8</sup>, Jiang Zhu<sup>1,2</sup>, Zifa Wang<sup>1,2,8</sup>

\*The copyright of individual parts of the supplement might differ from the CC BY 4.0 License.

**Table S1.** The 28 heterogeneous reactions considered in the NAQPMS

| No. | Heterogeneous Reaction                                                   | $\gamma$ (unitless)                                                                                                                                                                                                                                                                         |
|-----|--------------------------------------------------------------------------|---------------------------------------------------------------------------------------------------------------------------------------------------------------------------------------------------------------------------------------------------------------------------------------------|
| R1  | $\text{N}_2\text{O}_5 + \text{ASO}_4 \rightarrow 2\text{HNO}_3$          | $\gamma = \alpha \times 10^\beta$<br>$\alpha = 2.79 \times 10^{-4} + 1.3 \times 10^{-4} \times RH$<br>$\quad - 3.43 \times 10^{-6} \times RH^2$<br>$\quad + 7.52 \times 10^{-8} \times RH^3$<br>$\beta = 4 \times 10^{-2} \times (T - 294) \ (T \geq 282K)$<br>$\beta = -0.48 \ (T < 282K)$ |
| R2  | $\text{NO}_2 + \text{BC} \rightarrow 0.5\text{HONO} + 0.5\text{HNO}_3$   | $3 \times 10^{-3}$                                                                                                                                                                                                                                                                          |
| R3  | $\text{NO}_3 + \text{ASO}_4 \rightarrow \text{HNO}_3$                    | $3 \times 10^{-3}$                                                                                                                                                                                                                                                                          |
| R4  | $\text{HO}_2 + \text{ASO}_4 \rightarrow 0.5\text{H}_2\text{O}_2$         | $2.5 \times 10^{-3}$                                                                                                                                                                                                                                                                        |
| R5  | $\text{HCHO} + \text{ASO}_4 \rightarrow \text{PRODUCTS}$                 | $2.2 \times 10^{-2}$                                                                                                                                                                                                                                                                        |
| R6  | $\text{OH} + \text{ASO}_4 \rightarrow \text{PRODUCTS}$                   | $2 \times 10^{-1}$                                                                                                                                                                                                                                                                          |
| R7  | $\text{O}_3 + \text{BC} \rightarrow \text{PRODUCTS}$                     | $1.8 \times 10^{-4} \times e^{-\frac{1000}{T}}$                                                                                                                                                                                                                                             |
| R8  | $\text{NO}_2 + \text{BC} \rightarrow \text{HONO}$                        | $3.3 \times 10^{-4}$                                                                                                                                                                                                                                                                        |
| R9  | $\text{HNO}_3 + \text{BC} \rightarrow \text{NO}_2$                       | $2.1 \times 10^{-2}$                                                                                                                                                                                                                                                                        |
| R10 | $\text{N}_2\text{O}_5 + \text{BC} \rightarrow 2\text{HNO}_3$             | $5.0 \times 10^{-3}$                                                                                                                                                                                                                                                                        |
| R11 | $\text{O}_3 + \text{DUST} \rightarrow \text{PRODUCTS}$                   | $2.7 \times 10^{-5}$                                                                                                                                                                                                                                                                        |
| R12 | $\text{HNO}_3 + \text{DUST} \rightarrow \text{ANO}_3 + \text{PRODUCTS}$  | $\frac{c \times RH}{(1 - RH) \times (1 - 1(1 - c) \times RH)} \times 0.018 \ (c = 8)$                                                                                                                                                                                                       |
| R13 | $\text{NO}_2 + \text{DUST} \rightarrow 0.5\text{HONO} + 0.5\text{HNO}_3$ | $2.1 \times 10^{-6}$                                                                                                                                                                                                                                                                        |
| R14 | $\text{NO}_3 + \text{DUST} \rightarrow \text{HNO}_3$                     | $1.0 \times 10^{-3}$                                                                                                                                                                                                                                                                        |
| R15 | $\text{N}_2\text{O}_5 + \text{DUST} \rightarrow 2\text{HNO}_3$           | $3.0 \times 10^{-2}$                                                                                                                                                                                                                                                                        |
| R16 | $\text{OH} + \text{DUST} \rightarrow \text{PRODUCTS}$                    | $1.0 \times 10^{-1}$                                                                                                                                                                                                                                                                        |
| R17 | $\text{HO}_2 + \text{DUST} \rightarrow 0.5\text{H}_2\text{O}_2$          | $2.0 \times 10^{-1}$                                                                                                                                                                                                                                                                        |
| R18 | $\text{H}_2\text{O}_2 + \text{DUST} \rightarrow \text{PRODUCTS}$         | $12 \times RH^{-2} - 5.95 \times RH + 4.08$                                                                                                                                                                                                                                                 |
| R19 | $\text{SO}_2 + \text{DUST} \rightarrow \text{ASO}_4$                     | $1.0 \times 10^{-4}$                                                                                                                                                                                                                                                                        |
| R20 | $\text{CH}_3\text{COOH} + \text{DUST} \rightarrow \text{PRODUCTS}$       | $1.0 \times 10^{-3}$                                                                                                                                                                                                                                                                        |
| R21 | $\text{CH}_3\text{OH} + \text{DUST} \rightarrow \text{PRODUCTS}$         | $1.0 \times 10^{-5}$                                                                                                                                                                                                                                                                        |
| R22 | $\text{HCHO} + \text{DUST} \rightarrow \text{PRODUCTS}$                  | $1.0 \times 10^{-5}$                                                                                                                                                                                                                                                                        |
| R23 | $\text{N}_2\text{O}_5 + \text{SSA} \rightarrow 2\text{HNO}_3$            | $5.0 \times 10^{-3} (RH < 62\%)$<br>$3.0 \times 10^{-2} (RH \geq 62\%)$                                                                                                                                                                                                                     |
| R24 | $\text{NO}_3 + \text{SSA} \rightarrow \text{HNO}_3$                      | $1.0 \times 10^{-3}$                                                                                                                                                                                                                                                                        |
| R25 | $\text{HO}_2 + \text{SSA} \rightarrow 0.5\text{HONO}$                    | $2.0 \times 10^{-1}$                                                                                                                                                                                                                                                                        |
| R26 | $\text{SO}_2 + \text{SSA} \rightarrow \text{ASO}_4$                      | $5.0 \times 10^{-3} (RH < 50\%)$<br>$5.0 \times 10^{-2} (RH \geq 50\%)$                                                                                                                                                                                                                     |
| R27 | $\text{NO}_3 + \text{SSA} \rightarrow \text{ANO}_3$                      | $1.7 \times 10^{-2}$                                                                                                                                                                                                                                                                        |
| R28 | $\text{HNO}_3 + \text{SSA} \rightarrow \text{ANO}_3$                     | $5.0 \times 10^{-1}$                                                                                                                                                                                                                                                                        |

**Table S2.** Sensitivity tests of the uptake coefficients of R9.

| Configuration of the uptake coefficients |                    | Purpose                                                                 |
|------------------------------------------|--------------------|-------------------------------------------------------------------------|
| S1                                       | $\gamma_9 = 0.02$  | Evaluate the sensitivity of uptake coefficient in R9 to SIA simulations |
| S2                                       | $\gamma_9 = 0.01$  |                                                                         |
| S3                                       | $\gamma_9 = 0.005$ |                                                                         |
| S4                                       | $\gamma_9 = 0.025$ |                                                                         |
| S5                                       | $\gamma_9 = 0.0$   |                                                                         |

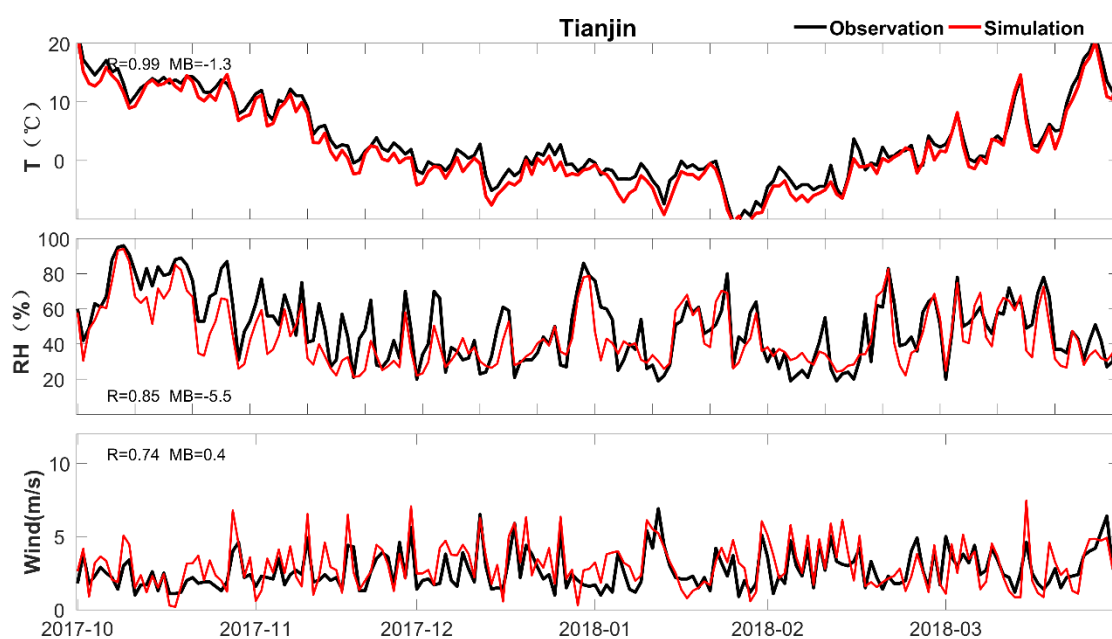**Figure S1.** Time series of the simulated (red) and observed (black) daily averaged meteorological parameters at the Tianjin site from 1 October, 2017 to 31 March, 2018.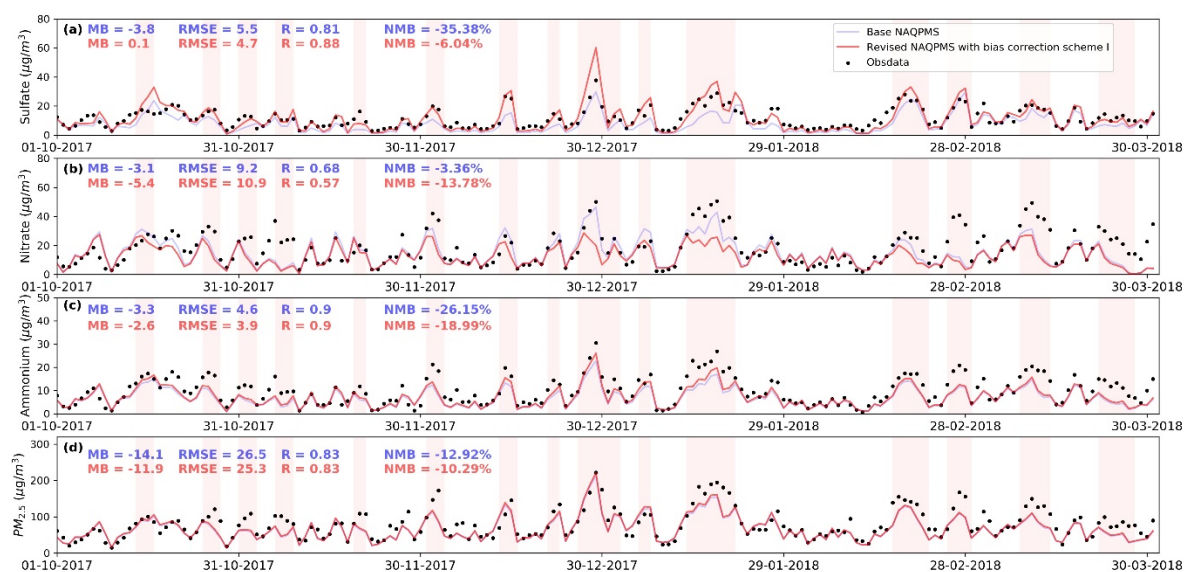**Figure S2.** Comparison of the simulated and observed (black solid cycles) daily sulfate (a), nitrate (b), ammonium (c) and PM<sub>2.5</sub> (d) concentrations averaged over the 28 monitoring sites in North China Plain from 1 October 2017 to 31 March 2018. The black dots correspond to the observations, and the red and blue lines indicate the simulations of the base run and the run with bias correction scheme I, respectively.

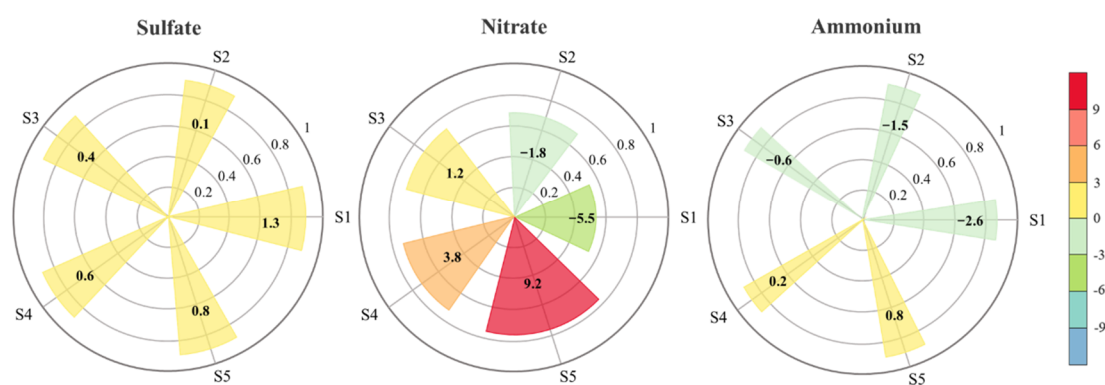

**Figure S3.** Rose diagram of the statistical indicators for the simulation of sulfate, nitrate and ammonium in the different cases of R9. The radius of each sector represents the degree of correlation between the simulations and observations, the radian indicates the RMSE, the different colours indicate the MB, and the value in the shaded block is the MB value.
